# Supplementary material for: High pseudocapacitance material prepared via in situ growth of Ni(OH)2 nanoflakes on reduced graphene oxide
Source: Royal Society of Chemistry journal article supplement (doi:10.1039/c2jm30243h), 2012-01-01
Supplement: c2jm30243h.pdf [file c2jm30243h.pdf]

Supplementary Material (ESI) for Journal of Material Chemistry

This journal is (c) The Royal Society of Chemistry 2012

**High pseudocapacitance materials prepared via in-situ  
growth of Ni(OH)<sub>2</sub> nanoflakes on reduced graphene oxide**

*Jie Chang, Huan Xu, Jing Sun\*, Lian Gao*

*The State Key Lab of High Performance Ceramics and Superfine Microstructure,  
Shanghai Institute of Ceramics, Chinese Academy of Sciences, 1295 Ding Xi Road,*

*Shanghai 200050, China*

*E-mail address: jingsun@mail.sic.ac.cn (J. Sun)*

*Tel: +86-12-52414301. Fax: +86-21-52413122*

Supplementary Material (ESI) for Journal of Material Chemistry

This journal is (c) The Royal Society of Chemistry 2012

## Electronic Supplementary Information (ESI)

### Supplementary Graphics

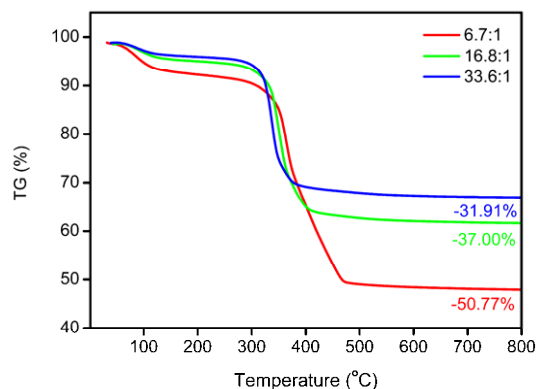

**Figure S1** TG curves of RGO/Ni(OH)<sub>2</sub> with the various mass ratio of Ni(Ac)<sub>2</sub>·4H<sub>2</sub>O to GO (6.7:1, 16.8:1, 32.6:1)

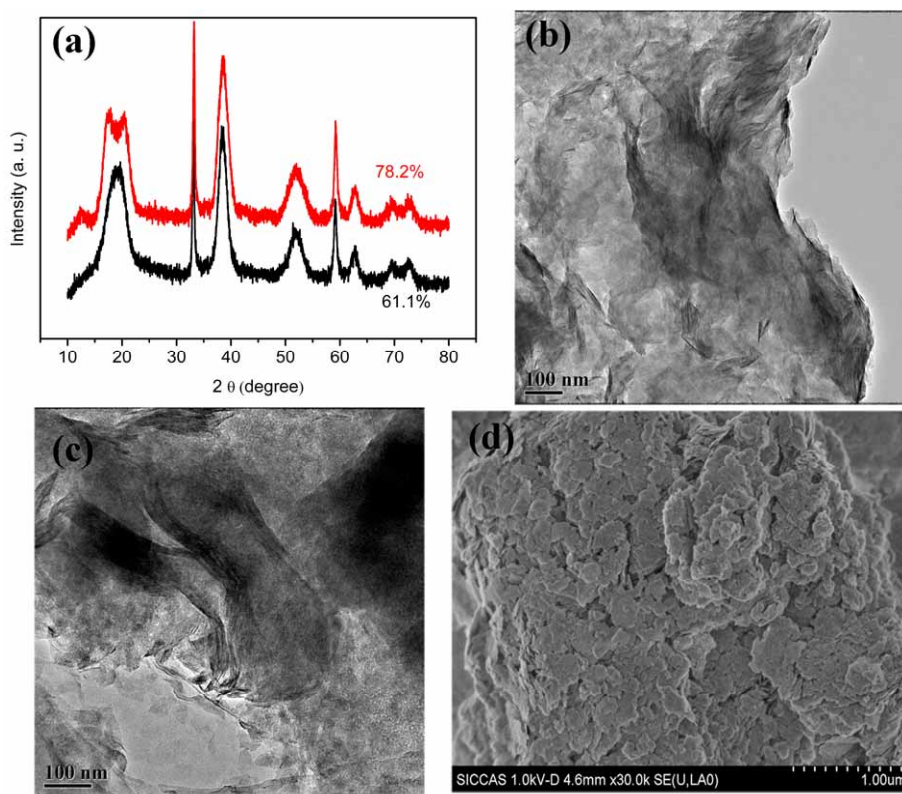

**Figure S2** (a) XRD patterns of RGO/Ni(OH)<sub>2</sub> composites with the mass ratio of Ni(OH)<sub>2</sub> 61.1% and 78.2%, TEM image of RGO/Ni(OH)<sub>2</sub> with 61.1wt% (b) and 78.2wt% (c) Ni(OH)<sub>2</sub> and typical SEM image of pure Ni(OH)<sub>2</sub> (d)
